# Supplementary material
Source: PubMed Central journal article supplement (PMC2708622)
Supplement: supp_83_15_7641__1.pdf [file supp_83_15_7641__1.pdf]

Supplemental figure 1

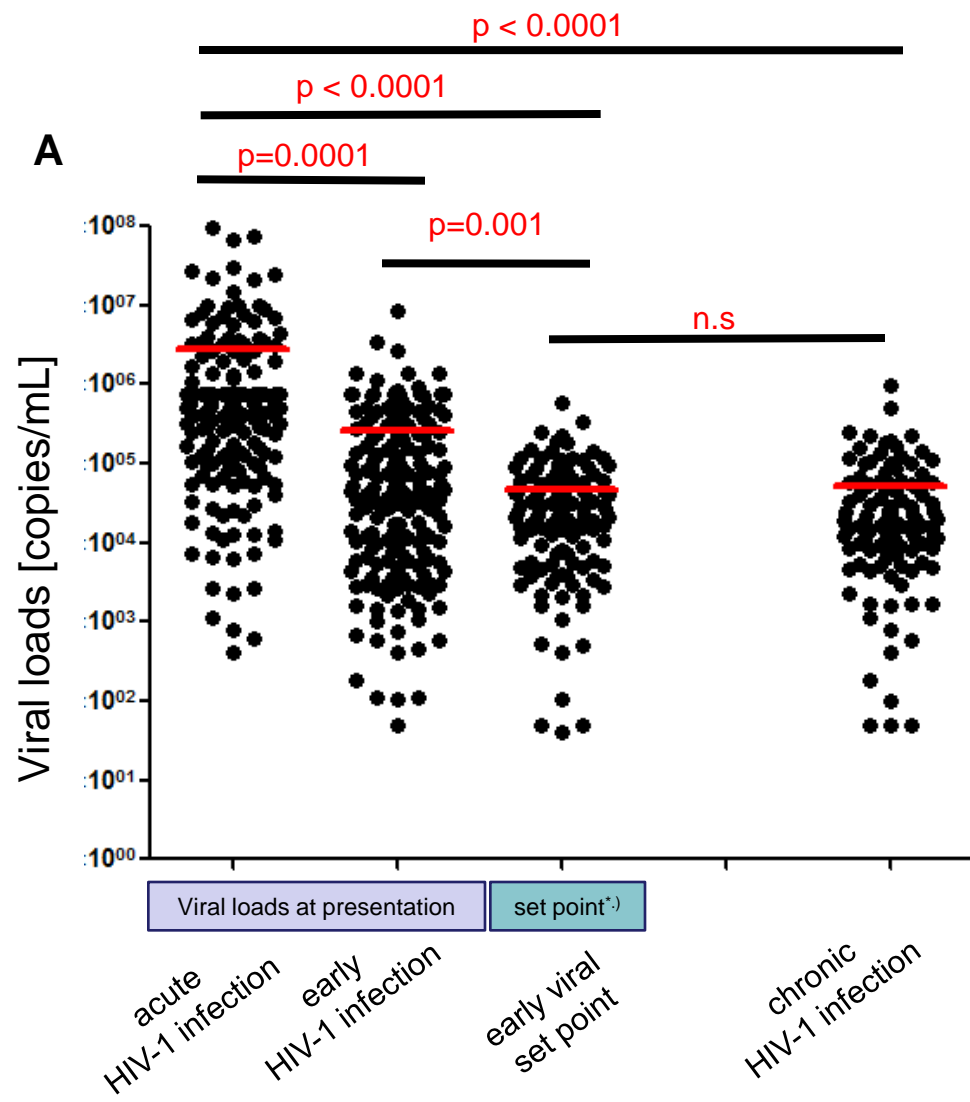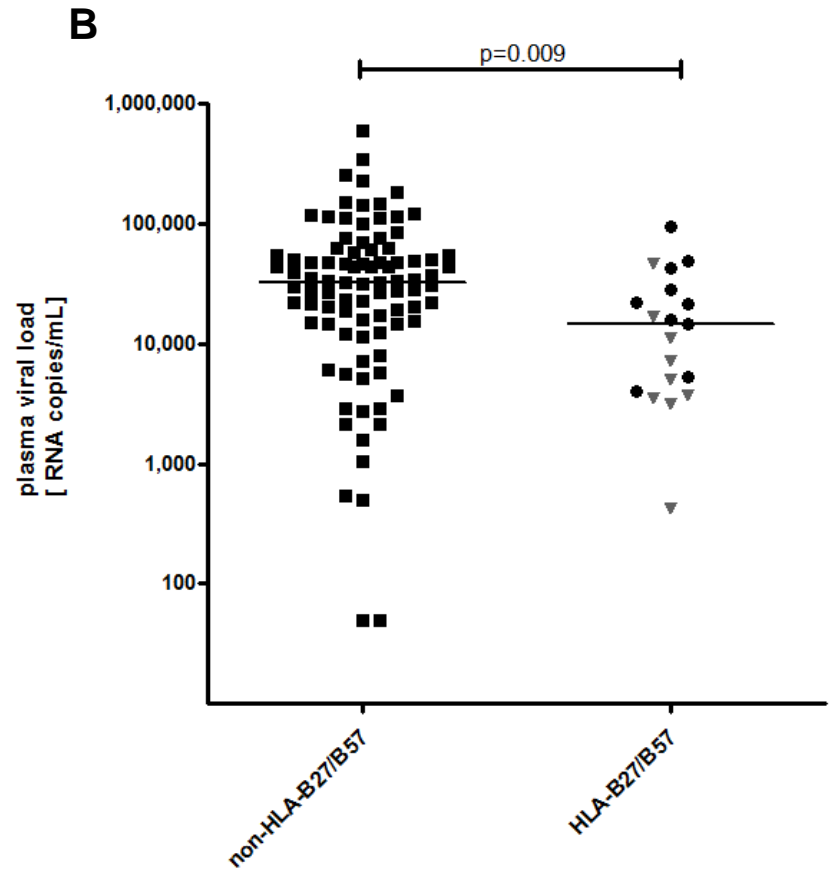

\*') in 110 treatment-naive subjects

**Supplemental figure 1.** *HIV-1 viral loads during acute, early and chronic infection and early viral set point of 110 treatment-naïve patients.* **suppl Figure 1A.** Plasma viral load levels of patients identified during acute (n=224), early (n=204) or chronic (n=99) HIV-1 infection are shown. Patients identified during acute HIV-1 infection had a significantly higher average viral load at time of presentation with 3,034,510 copies./mL (range: 399-95,000,000copies/mL) than patients identified during early HIV-1 infection (238,698 copies/ml; range 49 – 8,470,000; p=0.0001). For 110 of the 428 subjects a plasma viral set point was determined and in average with 42,752 copies/ml (range: 40 – 588,000) significantly lower compared to the viral load in the AHI group (p<0.0001) or EHI group (p=0.001) at presentation. In comparison, subjects identified during chronic HIV-1 infection had a similar average viral load of 42,664 copies/mL (range: 49 – 988,000).

**suppl. Figure 1B.** Individuals expressing the protective HLA-class I alleles HLA-B57 and -B27 had a significantly lower viral setpoint compared to those not expressing these two protective alleles (figure 3A; 20,749 copies/mL vs 55,140copies/mL; p=0.009). Subjects expressing HLA-B57 (shown as ▼ ) had a lower viral set point than subjects expressing HLA-B27 (shown as ● ), but this difference did not reach statistical significance.

supplemental table 1 – Frequency of epitope recognition in acute and chronic HIV-1 infection

| rank | HLA class I allele | epitope name | protein | sequence    | acute [%] | chronic [%] |
|------|--------------------|--------------|---------|-------------|-----------|-------------|
| 1    | B27                | B27-KK10     | p24     | KRWILLGLNK  | 81        | 43          |
| 2    | A25                | A25-QW11     | p24     | QAISPRTLNAW | 75        | 60          |
| 3    | B57                | B57-TW10     | p24     | TSTLQEQIGW  | 74        | 30          |
| 4    | B8                 | B8-FL8       | Nef     | FLKKEGGL    | 74        | 75          |
| 5    | B40                | B40-KL9      | Nef     | KEKGKLEGL   | 64        | 43          |
| 6    | A3                 | A3-RK9       | p17     | RLRPGGKK    | 62        | 56          |
| 7    | B38                | B38-W19      | Vif     | WHLGGQVSI   | 60        | 80          |
| 8    | B57                | B57-1SW9     | RT      | IYLPKEDSW   | 58        | 40          |
| 9    | B51                | B51-L19      | Int     | LPPVKAKEI   | 58        | 93          |
| 10   | B8                 | B8-E18       | p24     | EIYKWKLI    | 58        | 83          |
| 11   | B14                | B14-RL9      | gp41    | ERYLKDQQL   | 57        | 50          |
| 12   | B14                | B14-DM9      | p24     | DRFKFLRA    | 54        | 50          |
| 13   | B51                | B51-T18      | RT      | TASTIPSI    | 53        | 14          |
| 14   | A33                | A33-ER9      | Vpu     | EYRKILRQR   | 53        | 0           |
| 16   | A24                | A24-RW8      | Nef     | VHLPFGW     | 50        | 36          |
| 15   | B27                | B27-VL9      | Vpr     | VRHFRPRL    | 50        | 57          |
| 17   | A32                | A32-RW10     | gp120   | RIKIQINMW   | 47        | 30          |
| 18   | B53                | B53-YY9      | Nef     | YPLTFGWCY   | 47        | 75          |
| 19   | B38                | B38-WM9      | gp120   | MHEDISLW    | 46        | 0           |
| 20   | A11                | A11-AK11     | p24     | ACQGVGPGKH  | 46        | 70          |
| 21   | B58                | B58-TQW10    | p24     | TSTVREQIQ   | 45        | 0           |
| 22   | B57                | B57-HW9      | Nef     | HTQQYFPDW   | 45        | 30          |
| 23   | A11                | A11-ALK9     | Nef     | AVDSLHFLK   | 44        | 40          |
| 24   | Cw8                | Cw8-AL9      | Nef     | AAVDSLHFL   | 43        | 58          |
| 25   | B7                 | B7-L19       | gp41    | IPRRIRGGL   | 43        | 47          |
| 26   | A29                | A29-SY10     | gp120   | SPNCGGEFFY  | 42        | 50          |
| 27   | A29                | A29-SY9      | gp160   | SFEP1PIHY   | 42        | 0           |
| 28   | B51                | B51-E19      | Vpr     | EAVHFRPRI   | 42        | 14          |
| 29   | B40                | B40-KSL9     | p15     | KELVPLTSL   | 42        | 14          |
| 30   | B57                | B57-KF11     | p24     | KAFSPVEPMSF | 42        | 100         |
| 31   | A3                 | A3-KK9       | p17     | KIRLRPGGK   | 42        | 44          |
| 32   | Cw12               | Cw12-CC8     | Tat     | CCFHQVC     | 41        | 0           |
| 33   | A11                | A11-QK10     | Nef     | QVPLRPMQY   | 39        | 50          |
| 34   | A29                | A29-YT9      | Nef     | YFPDWNYYT   | 38        | 100         |
| 35   | Cw7                | Cw7-RY11     | Nef     | RRQDILLDIY  | 37        | 41          |
| 36   | B15                | B15-GY9      | p24     | GLNKIVRMV   | 37        | 60          |
| 37   | A26                | A26-EL9      | p24     | EVI MPFSAL  | 36        | 83          |
| 38   | B8                 | B8-RL9       | gp41    | RQGLERALL   | 36        | 17          |
| 39   | A24                | A24-KW9      | p17     | KYKLLKHIYV  | 34        | 9           |
| 40   | A3                 | A3-QK10      | Nef     | QVPLRPMQY   | 33        | 60          |
| 41   | B53                | B53-QW9      | p24     | QASQVKNW    | 33        | 38          |
| 42   | B57                | B57-SW10     | Int     | STTVKACNW   | 32        | 50          |
| 43   | B44                | B44-AW11     | p24     | AEQASQVKNW  | 32        | 77          |
| 44   | A25                | A25-EW10     | p24     | ETINERAAEW  | 31        | 40          |
| 45   | A32                | A32-TW10     | RT      | PIQKETWETV  | 30        | 40          |
| 46   | B40                | B40-L110     | p17     | IEIKDYEAL   | 30        | 29          |
| 47   | B57                | B57-YY9      | Nef     | YTPGQIRY    | 29        | 10          |
| 48   | B35                | B35-VY8      | Nef     | VPLRMTY     | 28        | 20          |
| 49   | B44                | B44-EM9      | pro     | EMMLPCRW    | 27        | 46          |
| 50   | B7                 | B7-GL9       | p24     | GPCHKARVL   | 27        | 29          |
| 51   | B7                 | B7-RY10      | Nef     | RQDILLDIY   | 27        | 35          |
| 52   | B40                | B40-L18      | RT      | IETVPKLL    | 27        | 43          |
| 53   | B7                 | B7-RV9       | Nef     | RPMTYKAAV   | 26        | 59          |
| 54   | Cw5                | Cw5-AM12     | p24     | AEQASQVKNW  | 26        | 58          |
| 55   | B40                | B40-AV9      | p24     | AEBWRVHPV   | 25        | 20          |
| 56   | A30                | A30-KY9      | Int     | KIQNFRVY    | 25        | 80          |
| 57   | A29                | A29-LY9      | p17     | LYNTVATY    | 24        | 38          |
| 58   | A33                | A33-TW9      | Nef     | TRYPLFGW    | 24        | 43          |
| 59   | B57                | B57-WN9      | p24     | ISPRTLNAW   | 23        | 60          |
| 60   | B35                | B35-NQV9     | RT      | NPD1VIQY    | 23        | 13          |
| 61   | Cw3                | Cw3-AL9      | Nef     | AAVDSLHFL   | 22        | 36          |
| 62   | Cw5                | Cw5-SL9      | Rev     | SAEPVPLQL   | 22        | 0           |
| 63   | B14                | B14-SL9      | Rev     | SAEPVPLQL   | 21        | 0           |
| 64   | B7                 | B7-TL10      | Nef     | TPGQVRYPL   | 21        | 53          |
| 65   | A30                | A30-KY9      | RT      | KLNWASQY    | 21        | 30          |
| 66   | A68                | A68-1R11     | Tat     | ITKGLGISYGR | 20        | 14          |
| 67   | B58                | B58-RY11     | p17     | RSLYNTVATY  | 20        | 11          |
| 68   | B8                 | B8-WM8       | Nef     | WPTVRERM    | 20        | 58          |
| 69   | B7                 | B7-SM9       | RT      | S PAIFQSSM  | 20        | 59          |
| 70   | A3                 | A3-ALK9      | Nef     | AVDSLHFLK   | 19        | 44          |
| 71   | B57                | B57-KY10     | Rev     | KAVRLKFLY   | 19        | 30          |
| 72   | B57                | B57-QW9      | p24     | QASQVKNW    | 19        | 30          |
| 73   | A11                | A11-QVK9     | RT      | QIYAGIKVK   | 19        | 20          |
| 74   | B40                | B40-L19      | RT      | IEELRQHLL   | 19        | 43          |
| 75   | B35                | B35-VY10     | RT      | VPLDEDFRY   | 19        | 7           |

| rank | HLA class I allele | epitope name | protein | sequence    | acute [%] | chronic [%] |
|------|--------------------|--------------|---------|-------------|-----------|-------------|
| 76   | B27                | B27-1K9      | p17     | IRLRPGGKK   | 19        | 43          |
| 77   | A2                 | A2-SL9       | p17     | SLYNTVATL   | 18        | 38          |
| 78   | Cw8                | Cw8-SL9      | Rev     | SAEPVPLQL   | 18        | 38          |
| 79   | A1                 | A1-RY9       | gp41    | RRGVEVLKY   | 17        | 14          |
| 80   | A3                 | A3-QR9       | RT      | QIYPIKVR    | 17        | 0           |
| 81   | B40                | B40-RL9      | Vpr     | REPHNWTL    | 16        | 20          |
| 82   | A2                 | A2-FK10      | p15     | PLKGIWFSYK  | 16        | 29          |
| 83   | B35                | B35-PY9      | p24     | PP1PVGDY    | 16        | 20          |
| 84   | Cw8                | Cw8-RV9      | p24     | RAEQASQEV   | 16        | 25          |
| 85   | B44                | B44-LY9      | p17     | LNTVATLY    | 16        | 31          |
| 86   | A1                 | A1-GY9       | p17     | GSSELRSLY   | 15        | 23          |
| 87   | A2                 | A2-Y19       | RT      | YAPTIPSI    | 15        | 19          |
| 88   | Cw6                | Cw6-TY9      | Nef     | YFPDQWY     | 15        | 42          |
| 89   | B27                | B27-GY10     | gp41    | GRGWEALKY   | 15        | 57          |
| 90   | B27                | B27-R110     | Nef     | RRQDILLDIY  | 15        | 43          |
| 91   | B7                 | B7-FL9       | Vpr     | FR1MLHGL    | 15        | 24          |
| 92   | B7                 | B7-R110      | gp120   | RFNNNRKSI   | 15        | 18          |
| 93   | B44                | B44-R111     | p24     | RDYVDRFYKTL | 15        | 50          |
| 94   | A2                 | A2-AL9       | Vpr     | AIRILQQL    | 15        | 24          |
| 95   | A24                | A24-LY10     | gp120   | FLCASSDAKAY | 14        | 18          |
| 96   | A24                | A24-R111     | p24     | RDYVDRFYKTL | 14        | 9           |
| 97   | A24                | A24-RL9      | gp41    | RYLKDQQLL   | 14        | 36          |
| 98   | B35                | B35-TY9      | RT      | TVLDVGDAY   | 14        | 33          |
| 99   | A26                | A26-EY9      | Pol     | ETKLGKAGY   | 14        | 33          |
| 100  | B7                 | B7-H110      | Vif     | HPRVSSVHI   | 14        | 12          |
| 101  | Cw8                | Cw8-TL9      | p24     | TPQDNLMT    | 14        | 50          |
| 102  | B18                | B18-YY9      | Nef     | YPLTFGWCY   | 13        | 54          |
| 103  | B53                | B53-TL9      | Gag     | TPYDINQML   | 13        | 0           |
| 104  | A1                 | A1-YT9       | Nef     | YFPDQWY     | 13        | 14          |
| 105  | A68                | A68-QV9      | p17     | QVSNQYPIV   | 13        | 0           |
| 106  | B35                | B35-DL9      | gp120   | DPNPQVLL    | 13        | 13          |
| 107  | A11                | A11-AK9      | RT      | AIFQSSMTK   | 12        | 40          |
| 108  | Cw3                | Cw3-RL9      | gp41    | RAIEAQQHL   | 12        | 27          |
| 109  | A2                 | A2-R19       | Vpr     | RILQQLLFI   | 12        | 10          |
| 110  | Cw4                | Cw4-SF9      | gp120   | SPNCGGEFF   | 11        | 44          |
| 111  | B8                 | B8-GK9       | p17     | GGKXYKLLK   | 11        | 17          |
| 112  | B44                | B44-AY9      | gp160   | AENLWTVY    | 11        | 8           |
| 113  | B18                | B18-DR11     | Vpr     | DTWAGVEAIR  | 11        | 21          |
| 114  | B51                | B51-E19      | RT      | EKGKRSKI    | 11        | 7           |
| 115  | B40                | B40-G19      | p15     | GELDRWEKI   | 11        | 0           |
| 116  | B40                | B40-TL8      | p15     | TERQANFL    | 11        | 20          |
| 117  | A2                 | A2-PL11      | Nef     | PLTFGWCKYL  | 11        | 17          |
| 118  | Cw8                | Cw8-HL9      | p17     | HLWASREL    | 11        | 17          |
| 119  | B15                | B15-FY10     | Tat     | FQTKGLGISY  | 11        | 27          |
| 120  | B40                | B40-QL10     | gp41    | QELKASAVSL  | 11        | 14          |
| 121  | B40                | B40-LS9      | Nef     | LEKHSATS    | 10        | 0           |
| 122  | A1                 | A1-IY9       | rev     | ISERILSTY   | 10        | 9           |
| 123  | Cw1                | Cw1-VL8      | p24     | V1MPFSAL    | 10        | 44          |
| 124  | A3                 | A3-RK10      | Vif     | RIRTKSLVK   | 10        | 24          |
| 125  | B58                | B58-W9       | RT      | IMESIVIM    | 10        | 11          |
| 126  | Cw15               | Cw15-RL9     | Env     | RAIEAQQHL   | 10        | 38          |
| 127  | B57                | B57-IF9      | Vif     | ISKKAKGW    | 10        | 30          |
| 128  | A2                 | A2-YL9       | p24     | YVDRFYKTL   | 9         | 10          |
| 129  | A23                | A2301-RL9    | gp41    | RYLKDQQLL   | 9         | 19          |
| 130  | Cw4                | Cw4-QW9      | p24     | QASQVKNW    | 9         | 0           |
| 131  | B51                | B51-RL9      | gp41    | RAIEAQQHL   | 9         | 29          |
| 132  | A11                | A11-1K10     | RT      | IYQEPFNKX   | 9         | 50          |
| 133  | B15                | B15-IY10     | RT      | IKLEPVHGVY  | 9         | 60          |
| 134  | B8                 | B8-DL9       | p24     | DCKTLKAL    | 9         | 0           |
| 135  | A30                | A30-IY9      | gp41    | IVNRRQGY    | 8         | 20          |
| 136  | A30                | A30-KQY9     | gp41    | KYCNLLQY    | 8         | 30          |
| 137  | A30                | A30-KY9      | RT      | KQNPDIYV    | 8         | 40          |
| 138  | A30                | A30-RY11     | p17     | RSLYNTVATY  | 8         | 40          |
| 139  | A3                 | A3-HK9       | Vif     | HMYISKKA    | 8         | 12          |
| 140  | B58                | B58-KY10     | Rev     | KAVRLKFLY   | 8         | 11          |
| 141  | Cw3                | Cw3-VL9      | p24     | YVDRFFKTL   | 7         | 18          |
| 142  | A3                 | A3-ATK9      | RT      | AIFQSSMTK   | 7         | 44          |
| 143  | A68                | A68-GA10     | RT      | GAETYPVDA   | 7         | 43          |
| 144  | B7                 | B7-HA9       | Gag     | HPVHAGPIA   | 7         | 6           |
| 145  | B7                 | B7-SV9       | p24     | SPRTLNAW    | 7         | 24          |
| 146  | A2                 | A2-RA9       | gp41    | R1RQGLERA   | 7         | 7           |
| 147  | A2                 | A2-VV9       | p24     | VLAERMSQV   | 7         | 5           |
| 148  | B40                | B40-KA9      | p24     | KEITNEEA    | 7         | 20          |
| 149  | B15                | B15-WF9      | Nef     | WRPDSRLAF   | 7         | 7           |
| 150  | B15                | B15-YL9      | p24     | YVDRFFKTL   | 7         | 13          |

| rank | HLA class I allele | epitope name | protein | sequence     | acute [%] | chronic [%] |
|------|--------------------|--------------|---------|--------------|-----------|-------------|
| 151  | A2                 | A2-IV9       | RT      | ILKEPVGHV    | 7         | 43          |
| 152  | B18                | B18-FK10     | p24     | FRDYVDRFY    | 7         | 0           |
| 153  | B18                | B18-LY10     | Vif     | LADQLLHLY    | 7         | 15          |
| 154  | B53                | B53-EW10     | Tat     | EPVDPKLEPW   | 7         | 75          |
| 155  | A1                 | A1-WH10      | Nef     | WRPDSRLAF    | 7         | 0           |
| 156  | A3                 | A3-AK11      | RT      | ALVEICTEME   | 6         | 4           |
| 157  | A3                 | A3-RK11      | RT      | MRGAHTNDVK   | 6         | 16          |
| 158  | A3                 | A3-RR11      | gp41    | RLRDLLLIVTR  | 6         | 8           |
| 159  | B57                | B57-AW9      | Vpr     | AVRHFRPW     | 6         | 20          |
| 160  | B57                | B57-KF9      | Int     | KFAVQMAVF    | 6         | 17          |
| 161  | A2                 | A2-SAV10     | Env     | SLMAITAV     | 6         | 17          |
| 162  | B7                 | B7-TM9       | Nef     | TPQVLRM      | 6         | 35          |
| 163  | A2                 | A2-L19       | Pro     | LYGPTVNI     | 6         | 5           |
| 164  | A3                 | A3-E18       | Rev     | ERILSTYGR    | 6         | 8           |
| 165  | A11                | A11-AK10     | Int     | AVFHNPKR     | 5         | 0           |
| 166  | A11                | A11-QK9      | RT      | QIIQLIKK     | 5         | 30          |
| 167  | B40                | B40-SL9      | p24     | SEGATPDL     | 5         | 14          |
| 168  | A2                 | A2-AM9       | RT      | ALVEICTEM    | 5         | 2           |
| 169  | A2                 | A2-VL9       | RT      | V1YQYDDL     | 5         | 2           |
| 170  | A68                | A68-DL9      | RT      | DTVLEEMML    | 5         | 0           |
| 171  | A68                | A68-LY9      | gp41    | IVTRIVELL    | 5         | 7           |
| 172  | B35                | B35-VL11     | gp120   | VFVWKEATTTL  | 5         | 7           |
| 173  | B7                 | B7-TL9       | p24     | TPQDLNML     | 5         | 35          |
| 174  | A3                 | A3-GK9       | RT      | G1PHGAL      | 5         | 12          |
| 175  | A3                 | A3-KK11      | Vif     | KTKPPLSPVK   | 5         | 16          |
| 176  | B15                | B15-GL9      | p24     | HQAAMQML     | 4         | 13          |
| 177  | B15                | B15-HL9      | p24     | HQAISPRTL    | 4         | 25          |
| 178  | A30                | A30-RV10     | RT      | RRRGAHTNDV   | 4         | 0           |
| 179  | B57                | B57-KV8      | pro     | KAIQTVLV     | 4         | 0           |
| 180  | B57                | B57-LL9      | Nef     | LTFGWCFKL    | 4         | 20          |
| 181  | B35                | B35-WF9      | p17     | WASRELERF    | 4         | 27          |
| 182  | B8                 | B8-EV9       | p17     | ELRSLYNTV    | 4         | 0           |
| 183  | B8                 | B8-YL8       | gp41    | YLQDQLL      | 4         | 25          |
| 184  | A68                | A68-EV10     | Vpr     | ETYGDTWGV    | 4         | 29          |
| 185  | B7                 | B7-FL9       | Nef     | FPVTPQVFL    | 4         | 6           |
| 186  | B14                | B14-CC9      | p15     | CRAPKKGK     | 4         | 17          |
| 187  | B15                | B15-LY12     | RT      | LVGKLNWASQIY | 4         | 13          |
| 188  | B15                | B15-RA9      | Nef     | RMRAEPA      | 4         | 0           |
| 189  | B15                | B15-TY11     | Nef     | TQGYFPDQWY   | 4         | 7           |
| 190  | B15                | B15-RY9      | Int     | RKAKIIRDY    | 4         | 33          |
| 191  | B15                | B15-V110     | Pol     | VTD5QVALGI   | 4         | 0           |
| 192  | B57                | B57-TY9      | Nef     | YFPDQWY      | 3         | 30          |
| 193  | B44                | B44-EV9      | p24     | EKEAFSPV     | 3         | 8           |
| 194  | A3                 | A3-AK10      | Int     | AVFHNPKR     | 3         | 24          |
| 195  | A3                 | A3-KK10      | RT      | KLVDFRELNK   | 3         | 8           |
| 196  | A3                 | A3-TK10      | gp120   | Y1YCVPMK     | 3         | 12          |
| 197  | B51                | B51-1110     | Vif     | IPLGDKLLI    | 3         | 14          |
| 198  | A2                 | A2-VL10      | Nef     | VLEWRPDSRL   | 3         | 0           |
| 199  | A68                | A68-IV9      | pro     | ITLWQRPLV    | 3         | 0           |
| 200  | B35                | B35-TW9      | gp41    | TAPWNWAS     | 3         | 20          |
| 201  | B15                | B15-FY10     | Int     | FKRKGIGY     | 2         | 6           |
| 202  | B15                | B15-IY9      | Int     | IQQF         |           |             |

Supplemental table 2 – Frequency of epitope recognition of immunodominant responses targeted in acute HIV-1 infection (n=428), acute subjects with viral set point (n=110) and chronic (n=99) HIV-1 infection

acute HIV-1 infection

| immunodominant epitope | HLA class I allele | Acute (n=428) [%] | Acute (n=110) [%] | Chronic (n=99) [%] |
|------------------------|--------------------|-------------------|-------------------|--------------------|
| B27-KK10(p24)          | B27                | 81                | 90                | 43                 |
| A25-EW10(p24)          | A25                | 75                | 100               | 60                 |
| B57-TW10(p24)          | B57                | 74                | 88                | 30                 |
| B8-FL8(Nef)            | B08                | 74                | 82                | 75                 |
| B40-KL9 (Nef)          | B40                | 64                | 61                | 43                 |
| A3-RK9 (p17)           | A03                | 62                | 70                | 56                 |
| B38-WI9 (Vif)          | B38                | 60                | 60                | 80                 |
| B38-MW9 (gp120)        | B38                | 46                | 75                | 0                  |
| B51-LI9 (Int)          | B51                | 58                | 50                | 93                 |
| B14-EL9(gp41)          | B14                | 57                | (75)              | 50                 |
| A33-ER9 (Vpu)          | A33                | 53                | (0)               | 0                  |
| A24-RW8(Nef)           | A24                | 50                | 54                | 36                 |
| A32-RW9(gp120)         | A32                | 47                | (50)              | 30                 |
| B53-YY9 (Nef)          | B53                | 47                | (50)              | 75                 |
| A11-AK11 (p24)         | A11                | 46                | 56                | 70                 |
| B58-TQW10              | B58                | 45                | (75)              | 0                  |
| Cw8-AL9 (Nef)          | Cw8                | 43                | 71                | 58                 |
| B7-IL9 (gp41)          | B07                | 43                | 47                | 47                 |
| A29-SY10 (gp120)       | A29                | 42                | (75)              | 0                  |
| Cw12-CC8 (Tat)         | Cw12               | 41                | 53                | 0                  |
| Cw7-RY11 (Nef)         | Cw07               | 37                | 42                | 41                 |
| B15-GY9 (p24)          | B15                | 37                | 50                | 60                 |
| A26-EL9 (p24)          | A26                | 36                | 57                | 83                 |
| B44-AW11 (p24)         | B44                | 32                | 33                | 77                 |
| B35-VY8 (Nef)          | B35                | 28                | 31                | 20                 |
| Cw5-AM12 (p24)         | Cw05               | 26                | 25                | 58                 |
| Cw5-SL9 (Rev)          | Cw5                | 22                | 31                | 0                  |
| A30-KYY9 (Int)         | A30                | 25                | (50)              | 80                 |
| Cw3-AL9 (Nef)          | Cw03               | 22                | 24                | 36                 |
| A68-IR11 (Tat)         | A68                | 20                | 13                | 14                 |
| A68-DR11 (Vpr)         | A68                | 11                | 25                | 21                 |
| A2-SL9 (p17)           | A02                | 18                | 20                | 38                 |
| A2-FK10 (p15)          | A02                | 6                 | 26                | 29                 |
| A1-RY9 (gp41)          | A01                | 17                | 10                | 14                 |
| Cw6-YT9 (Nef)          | Cw06               | 15                | 17                | 42                 |
| B18-YY9 (Nef)          | B18                | 13                | 25                | 54                 |
| Cw4-SF9 (gp120)        | Cw04               | 11                | 15                | 44                 |
| Cw1-VL8(p24)           | Cw01               | 10                | 9                 | 44                 |
| Cw15-RL9(Env)          | Cw15               | 10                | 33                | 38                 |
| A23-RL9 (gp41)         | A23                | 9                 | 17                | 0                  |

() targeted <5 times. Therefore not part of analysis.

chronic HIV-1 infection

| immunodominant epitope | HLA class I allele | Acute (n=428) [%] | Acute (n=110) [%] | Chronic (n=99) [%] |
|------------------------|--------------------|-------------------|-------------------|--------------------|
| A29-YT9 (Nef)          | A29                | 38                | -                 | 100                |
| B57-KF11(p24)          | B57                | 42                | 33                | 100                |
| B51-LI9 (Int)          | B51                | 58                | 50                | 93                 |
| A26-EL9(p24)           | A26                | 36                | 57                | 83                 |
| B8-EI8(p24)            | B8                 | 58                | 70                | 83                 |
| A30-KYY9 (Int)         | A30                | 25                | 75                | 80                 |
| B38-WI9 (Vif)          | B38                | 60                | 60                | 80                 |
| B44-AW11 (p24)         | B44                | 32                | 28                | 77                 |
| B53-EW10 (Tat)         | B53                | 7                 | -                 | 75                 |
| A11-AK11 (p24)         | A11                | 46                | 56                | 70                 |
| A25-EW10 (p24)         | A25                | 75                | 100               | 60                 |
| A32-PW10 (RT)          | A32                | 30                | (50)              | 60                 |
| A3-QK10 (Nef)          | A3                 | 33                | 40                | 60                 |
| B15-GY9 (p24)          | B15                | 37                | 50                | 60                 |
| B7-RV9 (Nef)           | B7                 | 26                | 35                | 59                 |
| Cw8-AL9 (Nef)          | Cw8                | 43                | 71                | 58                 |
| Cw5-AM12 (p24)         | Cw5                | 26                | 25                | 58                 |
| B27-VL9 (Vpr)          | B27                | 50                | 44                | 57                 |
| B18-YY9 (Nef)          | B18                | 13                | 25                | 54                 |
| B14-DA9 (p24)          | B14                | 54                | (100)             | 50                 |
| Cw1-VL8 (p24)          | Cw1                | 10                | 9                 | 44                 |
| Cw4-SF9 (gp120)        | Cw4                | 11                | 15                | 44                 |
| A2-IV9 (RT)            | A2                 | 7                 | 9                 | 43                 |
| A33-TW9 (Nef)          | A33                | 24                | 0                 | 43                 |
| A68-GA10 (RT)          | A68                | 7                 | 13                | 43                 |
| B40-IL8 (RT)           | B40                | 27                | 13                | 43                 |
| Cw6-YT9 (Nef)          | Cw6                | 15                | 17                | 42                 |
| Cw7-RY11 (Nef)         | Cw7                | 37                | 42                | 41                 |
| Cw15-RL9 (Env)         | Cw15               | 10                | 33                | 38                 |
| A24-RL9 (gp41)         | A24                | 14                | 21                | 36                 |
| Cw3-AL9 (Nef)          | Cw3                | 22                | 24                | 36                 |
| B35-TY9 (RT)           | B35                | 14                | 6                 | 33                 |
| B58-EW10 (Tat)         | B58                | 0                 | -                 | 33                 |
| A1-GY9 (p17)           | A1                 | 15                | 7                 | 23                 |
| A23-RL9 (gp41)         | A23                | 9                 | 17                | 0                  |
| Cw12-CC8 (Tat)         | Cw12               | 41                | 53                | 0                  |
